# Supplementary material
Source: publisher site journal article supplement (https://www.spandidos-publications.com/7167/downloadSupplementary)

Figure S1. 2, 3, 5-triphenyl tetrazolium chloride staining assay revealing minimal areas of infarction in the sham and sham + Rema groups (n=3). Rema, remimazolam.

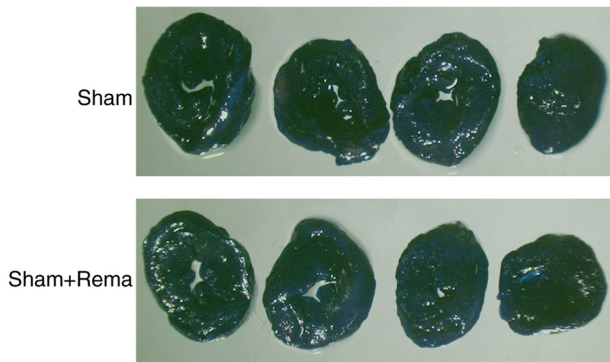

Supplement: Supplementary file 1 [file downloadSupplementary]
